# Supplementary material for: Astrocyte expression of the Drosophila TNF-alpha homologue, Eiger, regulates sleep in flies
Source: PLoS Genet. 2018 Oct 31;14(10):e1007724. doi: 10.1371/journal.pgen.1007724 (PMC6209136; doi:10.1371/journal.pgen.1007724)
Supplement: S1 Data — (XLSX) [file pgen.1007724.s002.xlsx]

## Sheet: Fig1a
Time	PBS	PBS	PBS	1mM	1mM	1mM	10mM	10mM	10mM	100mM	100mM	100mM	1000mM	1000mM	1000mM
	Mean	SD	N	Mean	SD	N	Mean	SD	N	Mean	SD	N	Mean	SD	N
1
2
3
4	18.7826	3.99107	23	27.1667	3.66188	30	35	3.95355	29	40.9643	3.152	28	52.6207	1.85191	29
5	28.6957	4.12379	23	20.1	3.91353	30	28.2759	4.85451	29	32.8571	4.16864	28	45.9655	3.48695	29
6	40.7826	3.44003	23	28.8333	4.01293	30	35.1724	4.43149	29	42.3929	3.56398	28	48.1379	2.99865	29
7	36.1739	3.96459	23	30.6	3.71038	30	36.1724	3.8609	29	42.1786	3.59381	28	46.5862	3.04867	29
8	34.8696	4.16664	23	31.5	3.53366	30	40.2069	3.784	29	46	2.9182	28	45.8965	3.26586	29
9	32.6957	3.85171	23	28.4	3.71409	30	37.3448	3.94927	29	42.8929	3.30678	28	39.6897	4.08593	29
10	24.8261	3.92401	23	23.1333	3.48156	30	30.7241	4.12427	29	40.1429	3.60288	28	40.1379	3.99807	29
11	13.087	3.13271	23	16.4667	3.47957	30	25.4828	4.39481	29	36.7857	4.09392	28	30.5862	4.81007	29
12	38.8261	2.17209	23	37.1667	2.19408	30	39.2069	2.58709	29	43.3214	3.13162	28	43.8965	2.71574	29
13	56.087	2.63671	23	58.9333	0.745767	30	59.5862	0.287324	29	57.2143	1.25816	28	59.3793	0.407485	29
14	56.7391	1.62274	23	59.3667	0.566261	30	58.931	0.561339	29	57.8929	1.78792	28	59.931	0.0689655	29
15	59.087	0.631558	23	59.7667	0.201622	30	58.5172	1.34331	29	59.5714	0.264418	28	59.7241	0.185008	29
16	58.7826	0.735751	23	59.6667	0.333333	30	58.2414	0.888702	29	57.5	1.23389	28	59	0.615882	29
17	59.913	0.0869565	23	59	0.865694	30	58.7586	0.631004	29	58.3571	1.04807	28	58.3448	0.989198	29
18	59.6522	0.271205	23	59.9333	0.0666667	30	58.6897	0.705544	29	59.0357	0.502592	28	59.5517	0.413998	29
19	60	0	23	60	0	30	58.1035	1.08544	29	59.6786	0.321429	28	60	0	29
20	60	0	23	59.8333	0.166667	30	58.7931	0.788431	29	59.4286	0.409635	28	58.0345	1.31726	29
21	60	0	23	59.7667	0.233333	30	58.7586	0.68347	29	60	0	28	58.8276	0.612008	29
22	59.5217	0.331898	23	59.7667	0.201622	30	59.5862	0.219253	29	59.9286	0.0495635	28	59.4138	0.392407	29
23	57.6957	1.43562	23	58.9667	0.965477	30	58.931	0.967363	29	58.7143	0.869618	28	59.9655	0.0344828	29
24	31.6957	4.32085	23	31.5	3.8167	30	38.4138	4.00723	29	41.25	4.25093	28	41.5862	3.3497	29

## Sheet: Fig1b
time	PBS			Non-Injected
	Mean	SD	N	Mean	SD	N
1
2
3
4	50.5556	2.01867	27	42.6774	2.87794	31
5	49.037	2.28925	27	47.6452	1.83018	31
6	46.2222	2.52189	27	49.9032	1.604	31
7	45.1482	2.0842	27	44.9032	2.31143	31
8	41.2222	2.79108	27	34.1936	3.34034	31
9	28.037	4.29685	27	21.4516	3.58697	31
10	16.2963	4.30358	27	8.93548	2.53913	31
11	13	4.52155	27	6.93548	2.61219	31
12	32.2963	4.17352	27	35.2903	2.88831	31
13	57.2222	0.986134	27	58.9677	0.504781	31
14	60	0	27	60	0	31
15	59.7407	0.137049	27	59.7097	0.259004	31
16	59.4815	0.303683	27	59.6129	0.248338	31
17	59.4444	0.418018	27	59.5161	0.216874	31
18	58.3333	0.660225	27	57.9355	1.00743	31
19	58.7037	0.530588	27	58.9032	0.415699	31
20	59.2593	0.401538	27	59.6774	0.134301	31
21	58	0.673046	27	59.2903	0.275109	31
22	57.7778	0.774106	27	58.8387	0.368364	31
23	56.4074	1.20334	27	58.0645	0.698594	31
24	35	3.96279	27	20.2258	3.45157	31

## Sheet: Fig1c
PBS	1mM	10mM	100mM	1000mM
93	76	118	85	110
97	25	116	116	81
	48	120	50	120
	115	102	73	93
50	20	119	34	110
30	120	115	53	117
		47		107
37	2	12	17	106
39	24	30	70	118
32	97	12	116	109
1	22	25	54	85
10	6	114	99	111
50	95	110	24	34
	88	2	23	120
10	15	5	81	114
	25	113	118	33
92	113	67	115	42
	2		69	95
85	69	93	11	117
53	18	0	38	117
55	112	40	59	118
47	40	108	27	114
6	0	101	91	111
102	85	0		110
	16			47
27	37		115	116
	43	21		120
113	17	48	120	100
25	11	35	76
30		48	108	84
8	31	19	120
	46	95	105

## Sheet: Fig1d
PBS	1mM	10mM	100mM	1000mM
403	175	474	259	446
271	284	279	449	286
	274	407	73	374
	444	453	325	435
95	51	468	115	458
145	328	471	209	473
		114		443
303	68	125	209	463
302	135	30	240	456
204	380	184	442	455
25	106	237	350	216
109	17	472	336	402
170	329	323	336	232
	202	219	317	380
233	267	59	423	239
	133	385	475	85
366	449	376	475	111
	2		326	362
305	256	395	147	421
317	76	171	232	468
341	439	124	268	375
259	294	458	270	329
140	52	308	334	333
214	335	44		184
	129			205
165	141		398	410
	288	144		477
362	127	226	432	258
69	60	198	276
247		230	418	363
243	204	39	479
	141	370	465

## Sheet: Fig1e
PBS	1mM	10mM	100mM	1000mM
33.3158	32.75	119	34.5385	98
32.7333	38.6923	38	49.1429	22.6818
	30.8125	90.1429	47.3333	277
	39.7059	77	40.3571	51.9231
22.3571	41.6667	78.6667	29.0909	77
30.1667	68	117.833	70.1667	101.857
		35.8889		46.9286
57.6667	47.5	19.2222	23.2632	87.875
40.5385	27	117	28.6875	42.875
22.1053	34.2778	47.1111	59.2727	57.5
38	34.6667	38.3333	29.8421	23.4211
23.2857	42.8	136.2	37.3333	35.6111
20.6316	28.8947	23.4783	82.2857	21.9
	15.4074	35.0833	39.7857	43.7143
30.0714	72.4286	33.875	50.4615	34.7692
	27.3077	38	178.75	50.5
34.75	57.25	26.0435	357.5	23.5714
	102.5		47.0833	27.3636
33.7333	19.08	35.2778	24.5	45.3571
28.4737	35.125	22.5294	57.5	100.857
53.1	43.8667	36.7778	25.4737	45.5385
33	25.85	63.2727	20.8261	30.3333
18.7778	30.75	28.9444	25	25.3182
55	49.9091	38.1667		49.5
	29.5			26.9333
21.2353	23.7143		41.9333	39.8125
	24.8571	21.1765		179.25
48.3333	26.3077	18.6957	67	34.0714
32.625	30.2222	60	35.4615
24.7368		18.7826	71.1111	29.3
34.9231	27.6	42.1667	359.5
	21	26.7273	100.714

## Sheet: Fig1f
PBS	1mM	10mM	100mM	1000mM
713	758	780	676	780
721	732	751	779	703
	706	752	704	716
	670	780	780	780
723	707	780	659	770
722	707	776	705	743
		699		740
707	706	707	729	780
738	706	725	736	769
725	774	780	726	773
698	718	713	753	747
712	681	690	715	714
713	726	711	780	725
	732	600	780	769
694	780	701	734	708
	718	717	780	721
710	776	716	780	743
	693		779	759
751	725	780	671	725
763	700	726	713	641
743	712	663	727	726
728	758	745	690	705
680	727	717	712	741
715	765	660		745
	734			689
707	675		757	744
	774	707		780
719	733	735	778	725
702	698	738	645
676		650	751	731
754	701	754	674
	718	758	780

## Sheet: Fig1g
PBS	1mM	10mM	100mM	1000mM
36.7778	720	720	666	720
681	693	238.667	720	335
	166.75	354	673	358
	56.2727	720	720	720
681	344	720	63.4	178.75
137	335.5	720	673	68.3
		223.333		141.2
669	669	666	676	720
135.6	670	116.833	232.333	359.5
676	358.5	720	139.2	718
166	173	335	179	139.6
674	221.333	132.2	134.2	50.3846
671	228.667	674	720	174.75
	232.667	22.1923	720	358.5
674	720	669	85.125	337.5
	676	337	720	113.833
232.333	359	134.6	720	352
	111.667		720	87.375
177.75	136.8	720	54.25	230.333
716	675	230.333	665	53
142.4	671	24.4615	345.5	344.5
171.75	119.167	68.5	66.1	95.4286
107.167	140.4	342	338	139.4
669	720	65.1		142.6
	172.25			223.333
171	664		141.2	174.25
	720	61		720
170.25	232.667	177.75	720	228.667
333.5	333	348	49.2308
633		125.6	709	98.2857
140.4	671	720	61.4
	341	720	720

## Sheet: Fig1h
PBS	1mM	10mM	100mM	1000mM
1282	1133	827	897	809
829	929	1037		1066
	861		742	1176
1029	858			1140
944	870		885	806
845		1133	933	921
1229	757	999
1034	875	788	1245
1269	773		816
994	1027	1015		1115
820	671
915	1073	824	1007	927
910		826		687
		719		895
1157	1020	827	1288	892
1185		1017		925
	1252			929
837	879			1102
1281	877	1019	826	883
1072	1004	720	817	1155
857		855	878
937	767	1021	1080	936
718		701	1311	1156
970	1014
	851			830
839		998	1205
	959	1084		819
	743	742
1058	947	766	764	960
791	1027		972
1056	1053		1292
986	1039

## Sheet: Fig2a
time	CS	CS	CS	CS	CS	CS	CS	CS	CS	CS	CS	CS	CS	CS	CS	CS	CS	CS	CS	CS	CS	CS	CS	CS	CS	CS	CS	CS	CS	CS	CS	CS	EGR1/EGR1	EGR1/EGR1	EGR1/EGR1	EGR1/EGR1	EGR1/EGR1	EGR1/EGR1	EGR1/EGR1	EGR1/EGR1	EGR1/EGR1	EGR1/EGR1	EGR1/EGR1	EGR1/EGR1	EGR1/EGR1	EGR1/EGR1	EGR1/EGR1	EGR1/EGR1	EGR1/EGR1
1	5	0	5	0	12	0	5	0		0	16	16	5	52	0	28	9	13	14	6	0	0	15	0	8	0	19	2	7	0	6	5	39	0		0	0	0	0	0	5	0	0	0	0	0	8	0	0
2	15	5	1	0	8	0	0	9		25	5	6	0	2	7	35	27	20	0	0	0	0	0	0	16	21	0	11	0	5	10	0	56	0		6	0	0	0	0	0	0	0	6	0	0	0	0	0
3	27	11	23	22	14	27	0	12		47	12	0	0	12	1	38	9	27	0	33	4	5	0	0	46	21	0	12	0	0	16	0	37	0		0	0	0	0	0	0	0	0	0	0	5	6	0	0
4	52	23	30	40	35	55	14	36		60	48	10	36	42	16	59	41	51	0	45	33	24	22	11	52	42	12	45	17	7	46	0	41	0		0	0	0	0	0	0	0	0	6	0	10	8	0	0
5	49	44	57	54	58	60	33	57		60	53	51	55	53	51	59	59	60	35	41	59	26	60	31	60	54	45	56	59	29	55	10	36	0		0	8	0	0	3	0	0	0	5	0	0	0	0	0
6	56	49	43	60	60	59	59	60		55	58	50	60	56	59	60	59	60	60	58	59	52	39	49	56	51	48	59	60	38	55	51	42	3		0	0	0	0	2	0	0	0	0	0	6	5	0	0
7	60	53	54	60	60	60	60	60		41	48	57	60	60	60	58	60	60	60	53	55	53	60	46	60	59	58	60	60	57	58	59	38	3		0	29	0	0	7	0	0	5	5	6	0	50	0	0
8	60	46	60	60	60	60	60	60		54	59	50	57	60	60	55	60	60	60	50	60	60	60	41	60	55	56	60	60	60	60	56	32	0		0	55	0	5	7	0	32	0	0	16	0	8	0	0
9	60	31	60	60	60	60	60	60		51	40	45	53	60	57	58	60	60	60	60	58	60	60	46	59	45	58	60	59	60	53	41	20	0		0	56	0	0	7	0	52	0	0	42	0	21	0	0
10	34	18	33	41	56	59	59	51		56	30	52	53	60	57	53	58	60	40	53	58	53	60	29	50	26	44	58	50	19	10	47	26	0		0	56	0	0	22	0	47	0	6	3	0	0	0	6
11	0	0	5	0	48	48	33	24		13	0	44	47	51	35	51	34	34	0	0	20	23	58	10	5	5	13	25	6	5	0	17	18	0		0	36	0	0	0	0	7	0	0	0	6	0	0	6
12	0	0	0	0	0	4	0	0		0	0	6	0	12	21	6	0	0	0	0	0	0	0	0	0	0	0	0	0	0	0	0	0	0		0	0	0	0	0	0	0	0	0	0	0	0	0	0
13	38	42	45	42	32	43	29	33		44	45	18	11	38	39	36	32	15	51	36	52	37	39	28	38	38	29	47	16	37	41	12	39	0		6	0	0	6	17	0	0	14	32	0	14	5	0	6
14	60	60	60	60	59	60	59	58		60	60	60	60	60	60	60	60	58	57	60	60	58	60	59	58	59	60	60	60	60	60	58	60	15		0	18	24	60	32	0	0	60	60	0	47	24	0	47
15	59	55	57	60	47	60	56	59		42	60	60	57	60	58	60	60	53	59	60	60	60	60	60	60	53	54	56	60	60	60	60	60	31		36	16	18	49	25	0	0	44	55	0	38	38	3	50
16	58	55	52	60	56	60	56	51		46	60	60	60	60	54	60	60	56	60	60	60	59	60	60	60	60	60	59	60	60	60	60	60	38		24	34	27	40	31	0	9	47	59	0	31	36	17	60
17	54	60	52	56	60	60	48	60		58	59	60	56	60	31	60	60	59	55	60	58	60	60	60	57	60	58	58	60	59	60	60	60	25		29	59	21	47	23	43	21	57	60	0	43	50	15	50
18	58	60	60	60	60	60	59	59		50	57	60	59	60	53	60	60	60	38	60	57	56	60	60	60	59	60	52	60	53	60	60	56	28		47	59	34	47	19	48	42	59	51	41	46	51	0	53
19	58	60	55	60	57	60	54	60		51	59	60	60	60	55	60	60	60	48	60	58	58	60	60	60	60	59	53	60	46	56	52	60	33		52	60	26	40	19	57	51	47	56	49	38	31	9	59
20	59	58	55	56	60	60	58	60		59	56	60	60	60	53	60	60	58	53	60	45	60	60	60	60	60	60	59	60	60	58	60	54	44		56	38	43	48	39	53	44	53	60	39	33	44	29	53
21	59	52	55	53	60	60	40	60		59	47	60	60	60	54	60	60	60	58	60	54	60	60	60	60	60	60	51	55	60	59	60	60	47		43	52	36	50	29	37	30	45	51	42	26	51	6	45
22	54	57	57	57	60	60	44	42		57	41	60	60	58	57	55	60	60	57	59	60	56	60	60	60	60	60	48	53	46	60	60	60	25		20	33	26	56	34	27	17	31	57	33	48	60	21	60
23	56	54	53	56	46	60	53	49		52	48	60	60	46	54	42	60	60	58	57	58	60	60	60	60	60	60	51	60	55	59	60	60	37		22	19	55	60	41	14	18	38	51	47	60	47	18	60
24	31	39	51	57	28	60	37	27		34	46	49	52	58	47	33	53	51	50	58	40	35	55	60	45	45	60	47	52	50	29	47	60	6		0	6	57	60	20	5	9	24	24	5	39	38	6	40
[truncated: 47 more columns]

## Sheet: Fig2b
CS	EGR1/EGR1	EGR3/EGR3
1062	1074	301
932	335
1023		1131
1074	341	1137
1096	634	888
1195	367	998
976	568	633
1047	377	1085
	289	199
1074	379	762
1007	524	682
1054	644	480
1081	323	1073
1200	490	723
1039	581	355
1206	124	993
1161	595	389
1155	619	942
973	175	869
1089	286	821
1068	415	191
1015	351	599
1128	599	510
950	331	246
1150	1073	972
1053	518	797
1033	359	531
1089	813
1034	616	614
926	508	396
1031	917	673
935	667	683
962	616	1091
634	662	822
907	687	653
850	615	752
1169	709	791
1383	223	767
1060	756	711
1074	152	713
601	359	621
1174	467	787
614	720	811
960	602	690
631	633	742
658	853	536
	409	654
	603	553
925	478	713
966	1217	694
1029	837	922
972	477	639
993	880	826
1158	582	687
997	903	570
614	641	759
	626	710
1007	686	738
925	732	467
981	644	655
786	693
657	682
639	591
	622
1140	423	384
	213	401
1090	794	551
984	209	305
	314	245
825	226	861
702	347	557
	415	331
1117	187
1115	383	430
1064	277	405
1059	473	223
1240	404	506
779	211	254
726	757	639
	434	928
1108	299
612	607	302
1018	507	552
819	421
972	560	439
933	613
1009	356	924
807	300	1305
646	472
	462	647
1173	289	570
1107	392
	486	332
1193	491	711
1185	532
1035	322	279

[truncated: 27 more sheets: Fig2c, Fig2d, Fig2e, Fig2f, Fig2g, Fig2h, Fig3(CS), Fig3(EGR1), Fig3(EGR3), Fig4a, Fig4b, Fig4c, Fig4d, Fig4e, Fig4f, Fig5a, Fig5b, Fig6a, Fig6b, Fig6c …]
